## Potential Structural Biomarkers in 3D Images Validated by the First Functional Biomarker for Early Age-Related Macular Degeneration - ALSTAR2 Baseline

Sohaib Fasih-Ahmad<sup>1</sup>, Ziyuan Wang<sup>1</sup>, Zubin Mishra<sup>1</sup>, Charles Vatanatham<sup>1</sup>, Mark E, Clark<sup>2</sup>, Thomas A. Swain<sup>2</sup>, Christine A. Curcio<sup>2</sup>, Cynthia Owsley<sup>2</sup>, Srinivas R Sadda<sup>1</sup>, Zhihong Jewel Hu<sup>1\*</sup>

1. Doheny Eye Institute, Pasadena CA USA

2. Ophthalmology and Visual Sciences, Heersink School of Medicine, University of Alabama at Birmingham, Birmingham AL USA

Correspondence and requests:

\* Zhihong Jewel Hu, Doheny Eye Institute, 150 North Orange Grove Blvd, Pasadena, CA 91103;  
Zhihonghu29@gmail.com

Running head: Potential Structural Biomarkers for Early AMD

### **Abstract**

**Purpose:** While intermediate and late age-Related Macular Degeneration (AMD) have been widely investigated, rare studies were focused on the pathophysiologic mechanism of early AMD. Delayed rod-mediated dark adaptation (RMDA) is the first functional biomarker for incident early AMD. The status of outer retinal bands on optical coherence tomography (OCT) may be potential imaging biomarkers and the purpose is to investigate the hypothesis that the integrity of interdigitation zone (IZ) may provide insight into the health of photoreceptors and retinal pigment epithelium (RPE) in early AMD.

**Methods:** We establish the structure-function relationship between ellipsoid zone (EZ) integrity and RMDA, and IZ integrity and RMDA in a large-scale OCT dataset from eyes with normal aging (n=237), early AMD (n=138), and intermediate AMD (n=101) by utilizing a novel deep-learning-derived algorithm with manual correction when needed to segment the EZ and IZ on OCT B-scans (57,596 B-scans), and utilizing the AdaptDx device to measure RMDA.

**Results:** Our data demonstrates that slower RMDA is associated with less preserved EZ ( $r = -0.334$ ;  $p < 0.001$ ) and IZ area ( $r = -0.591$ ;  $p < 0.001$ ), and decreased IZ thickness ( $r = -0.434$ ;  $p < 0.001$ ). These associations are not apparent when considering normal eyes alone.

**Conclusions:** The association with IZ area and RMDA in large-scale data is biologically plausible because retinoid availability and transfer at the interface attributed to IZ is rate-limiting for RMDA. This study

supports the hypothesis that the IZ integrity provides insight into the health of photoreceptors and RPE in early AMD and is a potential new imaging biomarker.

**Keywords:**

Rod-mediated dark adaption (RMDA), age-related macular degeneration (AMD), ellipsoid zone (EZ), interdigitation zone (IZ), optical coherence tomography (OCT), retinal layer integrity, photoreceptor outer segments, retinal pigment epithelium (RPE), retinoids

**Introduction**

Age-related macular degeneration (AMD) is a leading cause of irreversible central vision impairment worldwide<sup>1</sup> and subsequently causes significant psychological and socioeconomic burden due to depression, anxiety, and difficulty reading and driving.<sup>2-4</sup> Currently, strategies to reduce this burden focus on preventing or stabilizing end-stage neovascular and atrophic processes.<sup>5</sup> However, the vast majority of individuals with AMD have early disease<sup>6</sup> and there are no proven means to arrest the progression of early AMD, nor prevention strategies for those at high risk. A key barrier to developing preventative and therapeutic strategies is the lack of valid and responsive endpoints.<sup>7</sup>

Optical coherence tomography (OCT) is currently used to visualize 3D changes in retinal structure. In AMD, OCT biomarkers are used for diagnosis, management and for monitoring progression of the disease.<sup>8,9</sup> This study, concentrates on two hyperreflective bands seen on OCT termed the ellipsoid zone (EZ) and interdigitation zone (IZ) based on current consensus nomenclature.<sup>10,11</sup> OCT segmentation can be a time-consuming and tedious process.<sup>12</sup> Therefore, we applied a novel, deep-learning-derived, graph-based algorithm<sup>13</sup> for the automated segmentation that was manually corrected when needed to adequately analyze a large sample of B-scans in 3D OCT in an efficient yet highly accurate manner.

For regulatory approval, novel imaging biomarkers should have biologic plausibility by providing a biologic, physiologic, or pathologic pathway for the association of the biomarker with the disease and should have a contextual linkage between a biomarker and its intended use.<sup>14</sup> The current understanding of the hyperreflective EZ signal in spectral domain OCT is that it is dominated by mitochondria in photoreceptor inner segments,<sup>15-17</sup> and mitochondrial dysfunction contributes to the outer retinal degeneration seen in AMD.<sup>18-20</sup> Further, the hyperreflective IZ signal is attributed to the interface of photoreceptor outer segments, apical processes of the retinal pigment epithelium (RPE) and the surrounding interphotoreceptor matrix.<sup>21</sup> The RPE supports the photoreceptors at this interface by

transferring substances locally produced by the RPE or substances ultimately derived from circulation, such as retinoids, that are required for phototransduction and photoreceptor health.<sup>22</sup>

Delayed rod-mediated dark adaptation (RMDA) is a slower return to rod-mediated sensitivity following a bright light flash stimulus. RMDA was established as functional biomarker for incipient early AMD by the Alabama Study on Age-related Macular Degeneration (ALSTAR).<sup>23</sup> The retina has the highest metabolic demand in the body and this metabolic demand is even greater in the dark when ionic currents are flowing into the outer segments.<sup>24-26</sup> Given this metabolic demand in transitioning to the dark, it is plausible that mitochondrial dysfunction may play a role in delayed RMDA. Additionally, RMDA entails multiple steps which includes retinoid transfer from RPE to photoreceptors, and retinoid availability is a rate-limiting for the speed of RMDA.<sup>27, 28</sup> Consequently, one might hypothesize that delayed RMDA may be closely associated with changes in the EZ and IZ on OCT. **While The EZ has been shown to correlate with visual acuity, the relationships between EZ integrity and RMDA, as well as IZ integrity and RMDA, have not been well-defined.**

In this study, we utilize automated OCT segmentation with manual correction to explore the potential of EZ and IZ area on OCT as an imaging biomarker for early AMD by measuring their association with delayed RMDA.

## **Methods**

The Alabama Study on Early Age-Related Macular Degeneration 2 (ALSTAR2) is a prospective cohort study on normal aging and early and intermediate AMD whose purpose is to validate retinal imaging biomarkers in these conditions with visual function measures (Clinicaltrials.gov identifier NCT04112667, October 7, 2019)<sup>29</sup>. The study was approved by the Institutional Review Board of the University of Alabama at Birmingham. All participants provided written informed consent after the nature and purpose of the study were explained. Conduct of the study followed the Declaration of Helsinki. The baseline data from ALSTAR2 were collected between October 2019 and September 2021, which included a 4-month pause in enrollment due to the coronavirus pandemic (March-June 2020).

Participants  $\geq 60$  years old were recruited from the Callahan Eye Hospital Clinics, the clinical service of the University of Alabama at Birmingham Department of Ophthalmology and Visual Sciences. Three groups were recruited: those with early AMD and intermediate AMD, and those in normal macular health. The clinic's electronic health record was used to search for patients with early or intermediate AMD using International Classification of Diseases 10 codes (H35.30\*; H35.31\*; H35.36\*). One of the investigators (C.O.) screened charts to confirm that participants met the eligibility criteria. Exclusion

criteria were (1) any eye condition or disease in either eye (other than early cataract) in the medical record that can impair vision including diabetic retinopathy, glaucoma, ocular hypertension, history of retinal diseases (e.g., retinal vein occlusion, retinal degeneration), optic neuritis, corneal disease, previous ocular trauma or surgery, and refractive error  $\geq 6$  diopters; (2) neurological conditions that can impair vision or judgment including multiple sclerosis, Parkinson's disease, stroke, Alzheimer's disease, seizure disorders, brain tumor, traumatic brain injury; (3) psychiatric disorders that could impair the ability to follow directions, answer questions about health and functioning, or to provide informed consent; (4) diabetes; (5) any medical condition that causes significant frailty or was thought to be terminal. Persons in normal macular health met the same eligibility criteria except they were not classified with the International Classification of Diseases – 10 (ICD-10) codes indicative of AMD. Letters were sent to potential participants, with the study coordinator following up by phone to determine interest.

One eye was tested for each participant, with the eye selected for testing being the eye with better acuity. If the eyes had the same acuity, then an eye was randomly selected. Classification into the 3 groups was based on a trained grader's (M.E.C.) evaluation of 3-field color fundus photographs taken with a digital camera (FF-450, Carl Zeiss Meditec) following dilation with 1% tropicamide and 2.5% phenylephrine hydrochloride. The Age-Related Eye Disease Study (AREDS) 9-step classification system<sup>30</sup> was used by the grader to identify AMD presence and severity. Group membership was determined, as follows: eyes in normal macular health had AREDS grade 1, early AMD had grades 2 to 4, and intermediate AMD had grades 5 to 8. We also used the Beckman classification system<sup>31</sup> with normal aging defined to include grades 1 to 2, early AMD as grade 3, and intermediate AMD as grade 4. The grader was masked to all other participant characteristics. As previously described,<sup>32</sup> intra-grader agreement was  $K = 0.88$ ; intergrader agreement with a second grader was  $K = 0.75$ . Demographic information for birthdate, gender, and race/ethnicity were obtained through a self-administered questionnaire.

Rod-mediated dark adaptation was assessed with the AdaptDx device (Lumithera, Poulsbo WA). Testing occurred in a dark, light-tight room after dilation. RMDA was measured on the superior vertical meridian at  $5^\circ$  eccentricity to probe the area of proportionately greatest rod loss in aging and AMD.<sup>33, 34</sup> The procedure began with a photo-bleach exposure to a  $6^\circ$  diameter flash centered at each test target location (equivalent  $\sim 83\%$  bleach; 50 ms duration,  $58,000$  scotopic  $\text{cd}/\text{m}^2 \text{ s}$  intensity<sup>35</sup>) while the participant focused on the fixation light. Threshold measurement (3-down/1 up threshold strategy) for a

2° diameter, 500 nm circular target began 15 seconds after bleach offset. The participant was instructed to maintain fixation and press a button when the flashing target first became visible. Log thresholds were expressed as sensitivity in decibel units as a function of time since bleach offset. Threshold measurement continued at 30-second intervals until the RIT was reached. Rod intercept time is the duration in minutes required for sensitivity to recover to a criterion value of  $5.0 \times 10^{-3}$  scotopic  $\text{cd}/\text{m}^2$ ,<sup>23, 36</sup> located in the latter half of the second component of rod-mediated recovery.<sup>27, 37</sup> If RIT was not reached, the threshold measurement procedure stopped at 45 minutes. For some participants where the threshold measurement procedure was stopped, the AdaptDx's algorithm generated a RIT if it could be computed based on previous thresholds. Participants with fixation errors > 30% were excluded from analysis.

We acquired spectral-domain OCT volumes (Spectralis HRA+OCT, Heidelberg Engineering, Heidelberg, Germany;  $\lambda = 870 \text{ nm}$ ; scan depth, 1.9 mm; axial resolution,  $3.5 \mu\text{m}$  per pixel in tissue; lateral resolution,  $14 \mu\text{m}$  per pixel in tissue), with Automatic Real-Time averaging > 9, and quality (signal-to-noise) 20–47 dB. B-scans ( $n = 121$  scans, spacing =  $60 \mu\text{m}$ ) were horizontally oriented and centered over the fovea in a  $30^\circ \times 25^\circ$  ( $8.6 \times 7.2 \text{ mm}$ ) area.

The de-identified raw OCT B-scan volumes were imported into 3D-OCTOR, a previously described and validated SD-OCT reading center grading software.<sup>38-40</sup> A novel deep-learning-derived graph-based algorithm was applied to segment the inner and outer boundaries of the IZ and the outer boundary of the EZ.<sup>13</sup> Errors in automated segmentation were manually corrected and the boundaries were deleted if either band (EZ or IZ) was not clearly discernible in a region of scan, by a trained, masked grader (SFA).

For the EZ, the inner border of the hyperreflective EZ band was segmented by the algorithm and then manually adjusted as needed by the grader. The inner border of the EZ was defined as the hyperreflective pixel immediately subjacent to the overlying hyporeflective pixel of the myoid zone. If the grader was unable to distinguish the hyperreflective EZ band from the hyporeflective band of the myoid zone or the unnamed hyporeflective band between the EZ and IZ at any point on the B-scan, the segmentation was deleted. Subsequently, the area of EZ on that portion of the B-scan and half the distance to each adjacent B-scan was considered not discernible or not preserved.

Similarly, for the IZ, both the inner and outer boundaries were segmented by the algorithm and manually adjusted by the grader. The inner boundary of the IZ was defined as the hyperreflective pixel subjacent to the overlying hyporeflective band between the EZ and IZ. The outer boundary was defined as the hyperreflective pixel suprajacent to the underlying hyporeflective band between the IZ and RPE. If the

grader was unable to distinguish between the IZ and either the underlying or overlying hyporeflective bands the inner boundary was merged with the outer boundary. This results in the area of IZ on that portion of B-scan and half the distance to each adjacent B-scan to be considered not discernible (or not preserved), with a thickness of zero.

Figure 1 demonstrates examples of EZ and IZ grading in no AMD, early AMD, and intermediate AMD eyes. Figure 2 shows further examples of EZ and IZ grading in normal, early AMD, and intermediate AMD eyes on B-scans that include the fovea.

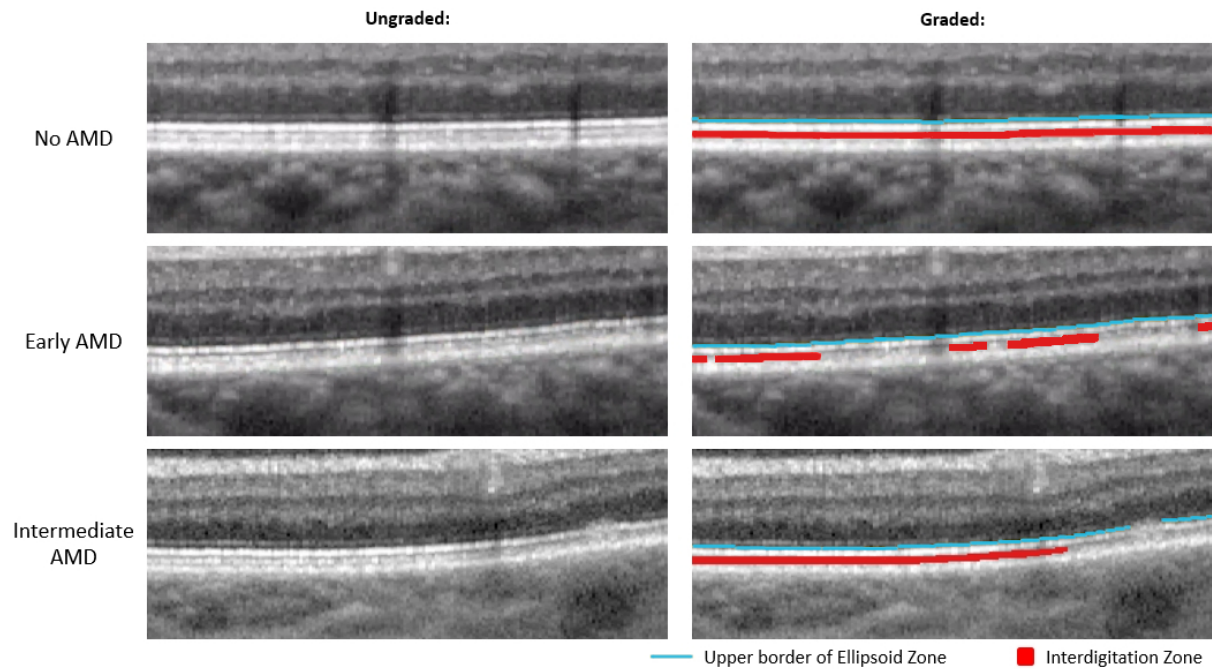

**Figure 1.** Magnified view of outer retinal bands in no AMD, early AMD, and intermediate AMD eyes. *Left:* Unaltered magnified OCT B-scans. *Right:* Same magnified OCT B-scan as the left side but graded for EZ and IZ. Yellow line is the upper border of the EZ which was used as a proxy for discernable EZ, Red area represents discernable IZ.

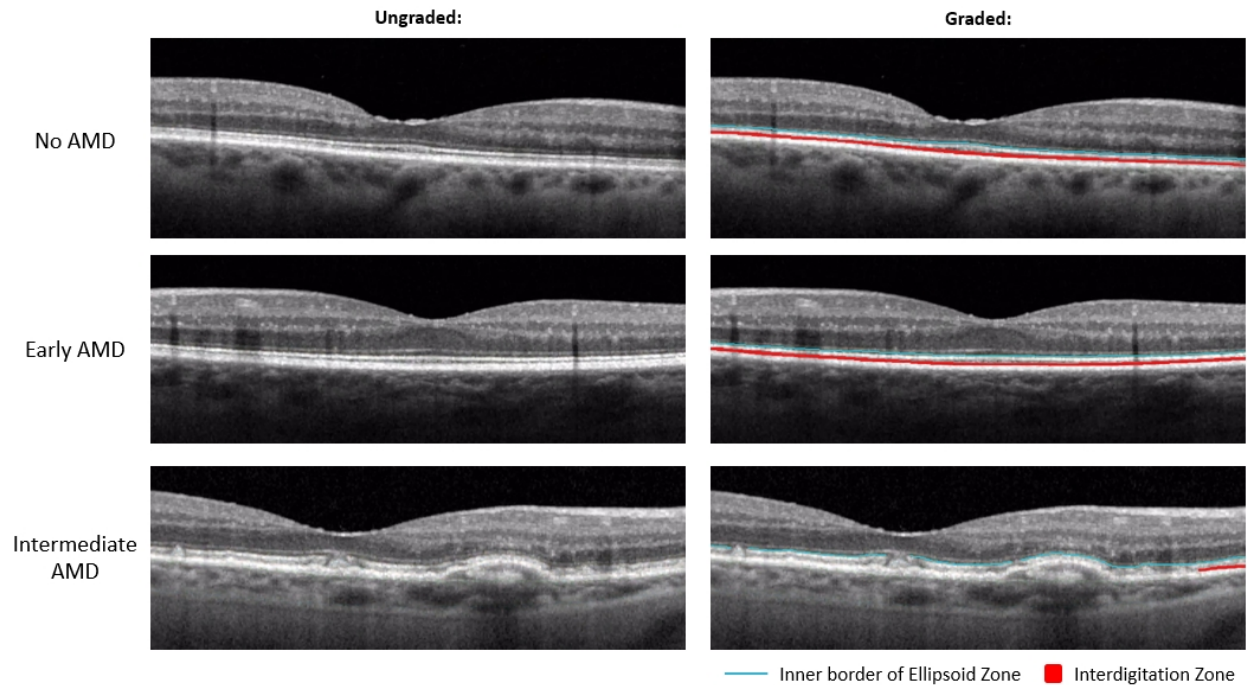

**Figure 2.** Magnified view of outer retinal bands on foveal B-scans in no AMD, early AMD, and intermediate AMD eyes. *Left:* Unaltered magnified OCT B-scans. *Right:* Same magnified OCT B-scan as the left side but graded for EZ and IZ. Yellow line is the upper border of the EZ which was used as a proxy for discernable EZ, Red area represents discernable IZ.

Mean area of IZ, mean thickness of IZ and mean area of EZ were computed in the entire fovea-centered Early Treatment of Diabetic Retinopathy Study (ETDRS) grading grid,<sup>41</sup> as well as within the central subfield, inner ring, and outer ring of the ETDRS grid, as implemented in the Spectralis software (radii of 0.5, 1.0-1.5, and 1.5-3.0 mm, respectively). Separate means were calculated for each of the 3 groups based on AREDS 9-step classification system<sup>30</sup>: normal, early AMD, and intermediate AMD. Differences in the groups were assessed using analysis of covariance (ANCOVA). The relationships between RIT and IZ area, IZ thickness, and EZ area were assessed using Spearman correlation coefficients ( $r$ ) and were age-adjusted. Spearman correlation coefficients were calculated for the entire ETDRS grid as well as the central, superior inner, and superior outer subfields for each of the 3 groups (normal eyes, early AMD, and intermediate AMD). The level of significance was  $p \leq 0.05$  (two-sided).

### Data Availability

The data and code generated during the study is accessible from the corresponding author based on reasonable request and subject to the rule/regulatory of the involved institutes.

### Results

A total of 476 eyes were assessed, of which 237 were classified as no AMD, 138 were classified as early AMD and 101 were classified as intermediate AMD. Demographics of this population are shown in Table 1.

The area of EZ on OCT is reduced in eyes with intermediate AMD compared to eyes with early AMD and is reduced in eyes with early AMD compared to eyes without AMD in the entire ETDRS grid as well as each of the subfields that were analyzed. Figure 3 demonstrates the en face maps generated by 3D-OCTOR representing the area of EZ and IZ within the ETDRS grid and the associated subfields.

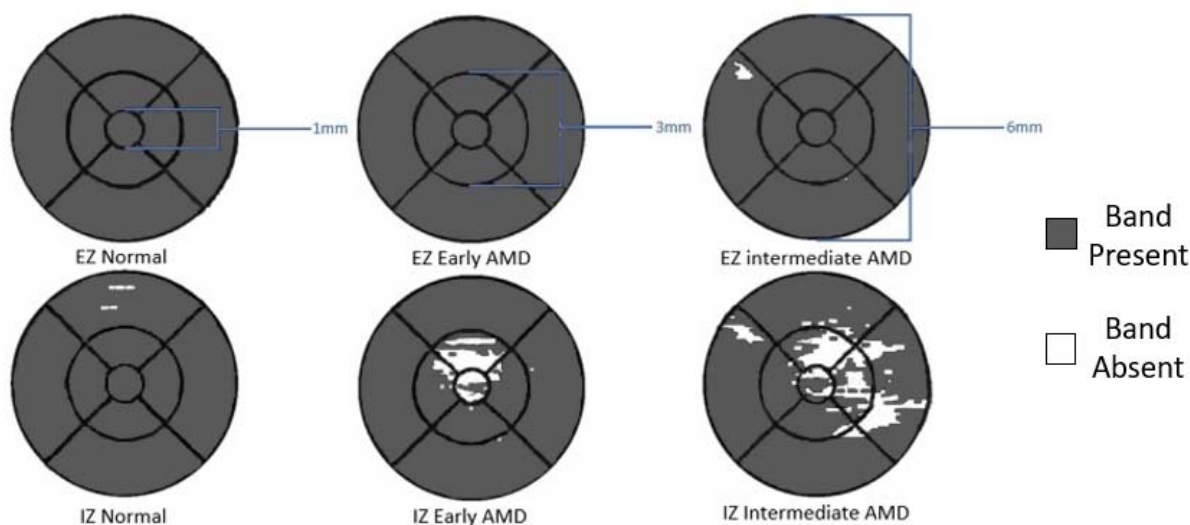

**Figure 3:** En face maps of the EZ and IZ in a normal aging, early AMD, and intermediate AMD eye within the ETDRS grid. The diameter of each subsection (central subfield, inner ring, outer ring) are labeled in blue. White regions indicate absence of the band (EZ or IZ); gray region indicate areas where the band is present

Slower RMDA (longer RIT) was associated with less preserved EZ area ( $r = -0.334$ ) in the entire ETDRS grid. The strength of this association was diminished, but still present, when considering each of the AREDS categories separately. Likewise, the same association was observed in each of the ETDRS subfields that were considered, and these associations were weaker than that of the entire ETDRS grid. In the central subfield, no correlation between EZ area and RIT was found when considering eyes in each of the AREDS categories separately. In the inner ring, slower RMDA was associated with less preserved EZ area only in eyes with intermediate AMD. In the outer ring, a similar association was observed with all eyes considered and in each of the AREDS categories considered separately. Table 2A and Figure 4 shows the associations for the various evaluated subfields.



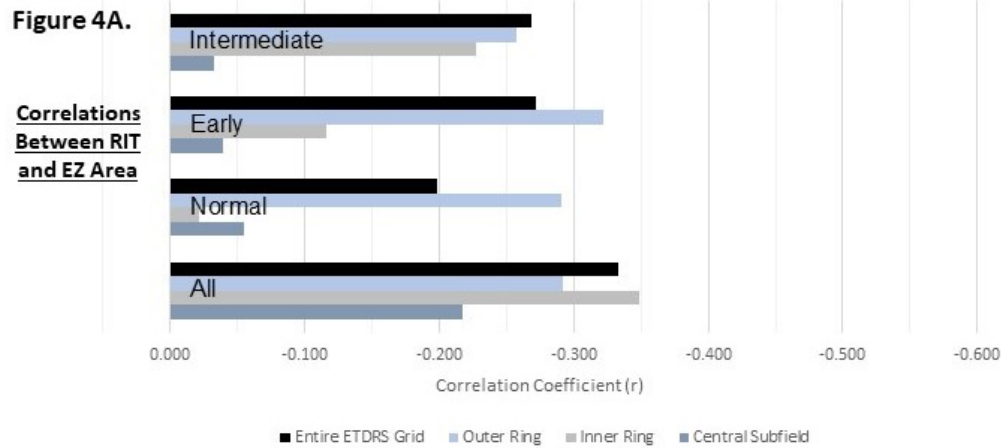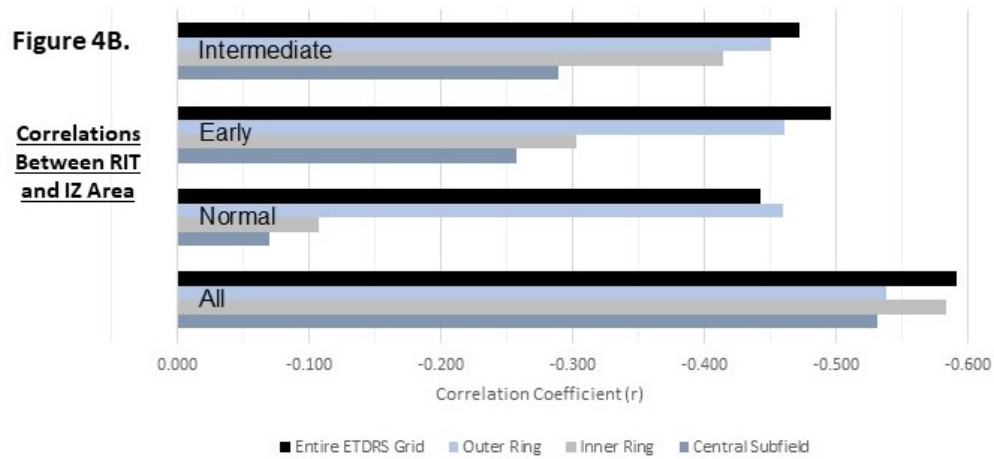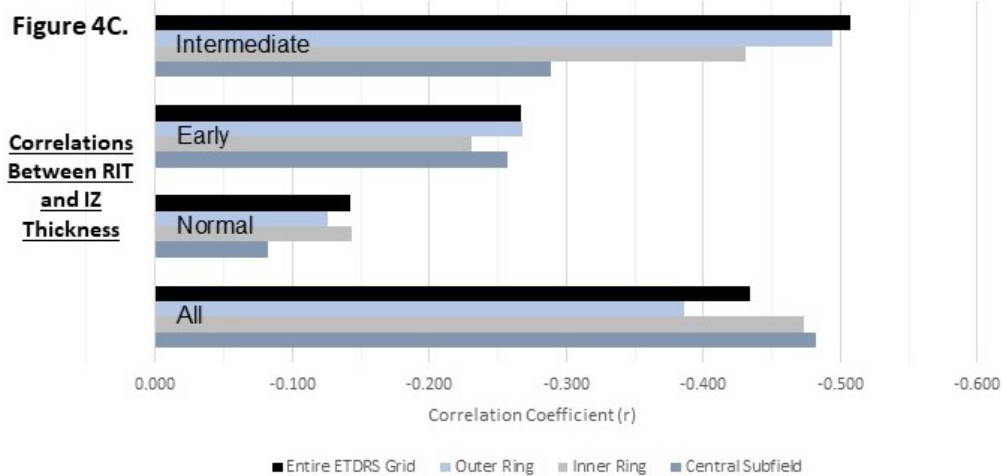

Figure 4A. Correlations between RIT and EZ area in the entire ETDRS grid, outer and inner rings, and central subfield of the ETDRS grid for all eyes, and only normal, early AMD and intermediate AMD eyes  
 Figure 4B. Correlations between RIT and IZ area in the entire ETDRS grid, outer and inner rings, and central subfield of the ETDRS grid for all eyes, and only normal, early AMD and intermediate AMD eyes  
 Figure 4C. Correlations between RIT and mean IZ thickness in the entire ETDRS grid, outer and inner rings, and central subfield of the ETDRS grid for all eyes, and only normal, early AMD and intermediate AMD eyes

Similar to the EZ, the area of IZ on OCT is decreased in eyes with intermediate AMD compared to eyes with early AMD and is decreased in eyes with early AMD compared to eyes without AMD in the entire ETDRS grid as well as each of the analyzed subfields.

Also, slower RMDA was associated with reduced IZ area for the entire ETDRS grid as well ( $r = -0.591$ ) and this association was stronger than that between EZ and RIT. This association was again weaker when each of the AREDS categories was considered separately but still notable with correlations of  $r = -0.442$  in normal eyes,  $r = -0.496$  in early AMD eyes, and  $r = -0.472$  in intermediate AMD eyes.

In the central subfield and inner ring, there was no association between IZ area and RIT in normal eyes. There was an association between slower RMDA and IZ area in early AMD and intermediate AMD eyes, but these correlations were notably weaker than the association when considering the entire ETDRS grid.

Conversely, in the outer ring, the association between slower RMDA and IZ area was observed in normal eyes ( $r = -0.460$ ) and this association was very similar in early AMD eyes ( $r = -0.460$ ) and intermediate AMD eyes ( $r = -0.450$ ). Additionally, this association was stronger in the outer ring than in the inner ring or central subfield when each AREDS category was considered separately, but weaker than the association observed while considering the entire grid except in normal eyes.

Associations between slower RMDA and mean thickness of the IZ were also observed for the entire ETDRS grid ( $r = -0.434$ ) as well as for each of the subfields we analyzed (Table 2B). Notably, these associations were weaker than those between IZ area and RIT. As for the EZ and IZ areas, the associations between RIT and IZ thickness were stronger in eyes with intermediate AMD compared to eyes with early AMD and stronger in eyes with early AMD compared to eyes without AMD. Furthermore, the association between IZ thickness and RIT was strongest in the central subfield, followed by the inner ring and then the outer ring.

## **Discussion**

In this study, we explored the structure-function relationship between preserved area of the EZ and IZ and mean thickness of the IZ on OCT B-scans with delayed RMDA. We found an association between delayed RMDA and each of these imaging biomarkers with the area of discernible IZ demonstrating the strongest association. This association was also found in the cone-dominant central subfield.

Previously, A.Y. Lee et al using a deep learning model demonstrated that delayed RMDA on foveal OCT B-scans correlates with variable reflectivity of the hyporeflective bands superficial and deep to the EZ.<sup>42</sup>

This variable reflectivity results in a blurring effect that could reduce the discernability of both the EZ and the IZ on OCT, a specific feature that we assessed in this study. The model utilized by Lee et al demonstrated a stronger correlation ( $r = 0.69$ ) between variable reflectivity of these hyporeflective bands and delayed RMDA<sup>42</sup> than any of the correlations we calculated between delayed RMDA and discernible EZ or IZ area. However, the strength of the correlation between IZ area in the entire ETDRS grid and RMDA from this study ( $r = 0.591$ ) were not very dissimilar to this previous study. Conversely, correlation with EZ area was notably weaker ( $r = 0.334$ ).

The Lee et al study was limited by evaluating only a single B-scan through the fovea while RIT is measured at 5° eccentricity<sup>42</sup> which may explain the discrepancy between that study and this one. This is because pathologic changes in AMD, such as changes that precede drusen formation, occur most prominently under the fovea.<sup>43-46</sup> However, pathology under the cone-rich fovea can impact rods in the nearby perifovea where RIT was measured.<sup>47</sup> As a result, structural changes in the outer retina seen at the fovea may be associated with delayed RMDA. However, our analysis showed slightly weaker correlations in the central foveal subfield of the ETDRS grid than the entire ETDRS grid between the retinal structures we analyzed and RMDA.

In AMD eyes, histopathologic studies have demonstrated preferential loss of rod cells in the macula of eyes with early disease compared with age-matched controls. The greatest loss occurred in the region 0.5-3 mm from the fovea.<sup>34</sup> This region aligns with the inner ring of the ETDRS grid, where the structure-function association between RMDA and IZ area was strongest with all eyes considered. However, when considering each AREDS category separately, we found the structure-function association was strongest in the outer ring, which contains the RMDA test point (5° eccentricity on the superior vertical meridian), rather than the inner ring or central subfield. This suggests that the observed structure-function association is related to local activity in the outer retina rather than simply a coincident delay in RMDA and decrease in discernible IZ across the entire macula. Additionally, in eyes without AMD, this association was seen in the outer ring only and not in the inner ring or central subfield, suggesting that the effect of local changes may be independent of AMD progression.

Therefore, it is plausible that delayed RMDA results from either central macular pathology, local pathology near the RMDA testing location, or a combination of both. Láíns et al reported that the presence of any abnormalities (EZ disruption, sub-RPE drusen, subretinal drusenoid deposits (SDD), hyperreflective foci, retinal atrophy, subretinal and intraretinal fluid, fibrosis, choroidal neovascularization, and serous pigment epithelial detachment) within the RMDA test spot (located at

the same place as ours), as well as any abnormalities in the macula, were significantly associated with longer RIT and therefore delayed RMDA. This association was stronger with abnormalities at the RMDA test spot<sup>48</sup> which corresponds to our finding that in normal and early AMD eyes in which abnormalities in the entire macula are relatively rare, the structure-function relationship between RMDA and IZ and EZ area are stronger in the ETDRS ring containing the RMDA testing spot as those abnormalities likely contribute to a greater proportion of the loss in EZ and IZ than in intermediate eyes.

SDD, also termed reticular pseudodrusen, first appear within the outer subfields of the ETDRS grid and commonly spread toward the fovea.<sup>49</sup> Several studies demonstrate that the presence of SDD is associated with markedly delayed RMDA.<sup>48, 50-52</sup> Stage 1 SDD are defined by diffusely distributed granular hyperreflective material between the RPE and the EZ, blurring the boundaries between normally well delineated hyperreflective IZ and RPE lines. Stage 2 and 3 represent the expansion of hyperreflective material accumulation between the RPE and EZ that further distorts band boundaries, with stage 3 SDD protruding upward through the EZ.<sup>53-55</sup> SDD abundance in the ETDRS outer ring and progression impacting EZ discernability possibly explains why associations between RMDA and EZ area are stronger in the outer ring of early AMD eyes than in intermediate AMD.

We speculate that the same mechanisms may be responsible for both the decrease in IZ discernability and delay in RMDA. RPE outer segments and apical processes containing melanosomes contribute reflectivity to the IZ<sup>56</sup> and these RPE apical processes also contain many proteins relevant to the retinoid processing pathways.<sup>57</sup> The RPE supports the photoreceptors at the IZ by transferring retinoids required for phototransduction<sup>22</sup> and the availability of retinoids is ultimately rate-limiting for RMDA.<sup>27</sup> Therefore, a reduction of IZ anatomical substrates could delay RMDA. Furthermore, the RPE is thought to undergo several structural changes with aging, including loss of melanin.<sup>58</sup> It should be noted that we age-adjusted the correlations to better isolate the impact of AMD on the IZ and RMDA and eliminate the potentially confounding effect of normal aging.

Strengths of this study include a large sample (n = 476) of eyes in a cohort designed to cross-sectionally probe the transition from normal aging to AMD, and a comprehensive 3D OCT analysis of the bands of interest throughout the macula utilizing dense volume scanning (121 B-scans in an 8.6mm × 7.2mm area). While a few of retinal layer segmentation algorithms performed overall well in OCT,<sup>59-61</sup> our deep-learning-derived graph-based algorithm<sup>13</sup> is the only one which can segment all the retinal deposits, and can reflect the subtle IZ changes in early AMD. It allows us to improve our understanding of the functional RMDA by assessing how structural changes in different regions of the macula are associated

with RMDA. Limitations include a relatively homogenous population dominated by participants of European descent and an OCT analysis restricted to ETDRS regions rather than the exact RMDA test location. On the other hand, it is unclear how wide an area surrounding the test spot may contribute to the measured RMDA.

In conclusion, **RMDA is correlated with the status of outer retinal bands in early and intermediate AMD eyes. The correlation of IZ with RMDA is stronger than that of EZ.** IZ integrity on OCT fulfills the conditions of a valuable imaging biomarker for early AMD by establishing a structure-function association with delayed RMDA. This relationship is biologically plausible, because retinoid availability and transfer at this interface is rate-limiting for RMDA. The structure-function association of EZ area and RMDA was weaker and likely useful only in later stages of AMD. Future studies assessing other aspects of retinoid availability to the photoreceptors and their relationship to IZ area may offer further support for IZ on OCT as an imaging biomarker for early AMD.

### **Acknowledgements**

This work was supported by the National Eye Institute of the National Institutes of Health under Award Numbers R01EY029595 and R21EY030619, Research to Prevent Blindness, EyeSight Foundation of Alabama, and the Dorsett Davis Discovery Fund.

### **Disclosures**

*CAC receives research funds from Genentech/Hoffman LaRoche, Heidelberg Engineering, Regeneron, and Novartis, and consults for Apellis, Astellas, Boehringer Ingelheim, Character Biosciences, Osanni, and Annexon (outside this project). CO consults for Johnson & Johnson Vision (outside this project) and is a patent holder for the AdaptDx. SRS consults for 4DMT, Alexion, Allergan Inc., Alnylam Pharmaceuticals, Amgen Inc. Apellis Pharmaceuticals, Inc. Astellas, Bayer, Healthcare Pharmaceuticals, Biogen MA, Inc., Boehringer Ingelheim, Carl Zeiss Meditec, Catalyst Pharmaceuticals Inc., Centervue Inc., Genentech, Gyroscope Therapeutics, Heidelberg Engineering, Hoffman La Roche, Ltd., Iveric Bio, Janssen Pharmaceuticals, Inc., Merck & Co., Inc, Nanoscope, Notal Vision Inc., Novartis, Optos Inc., Oxurion/Thrombogenics, Oyster Point Pharma, Pfizer Inc., Regeneron Pharmaceuticals Inc., Samsung Bioepis and Vertex Pharmaceuticals Inc., lectures for Carl Zeiss Meditec, Heidelberg Engineering, Nidek Inc., Novartis Pharma, and Topcon Medical Systems Inc., and, receives grant funding from Carl Zeiss Meditec and Heidelberg Engineering (outside this project). ZJH receives research funds from Heidelberg Engineering (outside this project).*

## References

1. Wong WL, Su X, Li X, et al. Global prevalence of age-related macular degeneration and disease burden projection for 2020 and 2040: a systematic review and meta-analysis. *Lancet Glob Health* 2014;2:e106-116.
2. Cimarolli VR, Casten RJ, Rovner BW, Heyl V, Sorensen S, Horowitz A. Anxiety and depression in patients with advanced macular degeneration: current perspectives. *Clin Ophthalmol* 2016;10:55-63.
3. Markowitz M, Daibert-Nido M, Markowitz SN. Rehabilitation of reading skills in patients with age-related macular degeneration. *Can J Ophthalmol* 2018;53:3-8.
4. Owsley C, McGwin G, Jr. Driving and Age-Related Macular Degeneration. *J Vis Impair Blind* 2008;102:621-635.
5. Fabre M, Mateo L, Lamaa D, et al. Recent Advances in Age-Related Macular Degeneration Therapies. *Molecules* 2022;27.
6. Rein DB, Wittenborn JS, Burke-Conte Z, et al. Prevalence of Age-Related Macular Degeneration in the US in 2019. *JAMA Ophthalmol* 2022;140:1202-1208.
7. Csaky K, Ferris F, 3rd, Chew EY, Nair P, Cheetham JK, Duncan JL. Report From the NEI/FDA Endpoints Workshop on Age-Related Macular Degeneration and Inherited Retinal Diseases. *Invest Ophthalmol Vis Sci* 2017;58:3456-3463.
8. Schmidt-Erfurth U, Klimescha S, Waldstein SM, Bogunovic H. A view of the current and future role of optical coherence tomography in the management of age-related macular degeneration. *Eye (Lond)* 2017;31:26-44.
9. Jaffe GJ, Chakravarthy U, Freund KB, et al. Imaging Features Associated with Progression to Geographic Atrophy in Age-Related Macular Degeneration: Classification of Atrophy Meeting Report 5. *Ophthalmol Retina* 2021;5:855-867.
10. Staurengi G, Sadda S, Chakravarthy U, Spaide RF, International Nomenclature for Optical Coherence Tomography P. Proposed lexicon for anatomic landmarks in normal posterior segment spectral-domain optical coherence tomography: the IN\*OCT consensus. *Ophthalmology* 2014;121:1572-1578.
11. Spaide RF, Curcio CA. Anatomical correlates to the bands seen in the outer retina by optical coherence tomography: literature review and model. *Retina* 2011;31:1609-1619.
12. Weese J, Lorenz C. Four challenges in medical image analysis from an industrial perspective. *Med Image Anal* 2016;33:44-49.
13. Mishra Z, Ganegoda A, Selicha J, Wang Z, Sadda SR, Hu Z. Automated Retinal Layer Segmentation Using Graph-based Algorithm Incorporating Deep-learning-derived Information. *Sci Rep* 2020;10:9541.
14. FDA-NIH Biomarker Working Group b. Contents of a Biomarker Description. *BEST (Biomarkers, EndpointS, and other Tools) Resource*. Silver Spring (MD). Bethesda (MD): Food and Drug Administration (US); 2020.
15. Hoang QV, Linsenmeier RA, Chung CK, Curcio CA. Photoreceptor inner segments in monkey and human retina: mitochondrial density, optics, and regional variation. *Vis Neurosci* 2002;19:395-407.
16. Litts KM, Zhang Y, Freund KB, Curcio CA. Optical Coherence Tomography and Histology of Age-Related Macular Degeneration Support Mitochondria as Reflectivity Sources. *Retina* 2018;38:445-461.
17. Berkowitz BA, Podolsky RH, Childers KL, et al. Functional Changes Within the Rod Inner Segment Ellipsoid in Wildtype Mice: An Optical Coherence Tomography and Electron Microscopy Study. *Invest Ophthalmol Vis Sci* 2022;63:8.
18. Litts KM, Messinger JD, Freund KB, Zhang Y, Curcio CA. Inner Segment Remodeling and Mitochondrial Translocation in Cone Photoreceptors in Age-Related Macular Degeneration With Outer Retinal Tubulation. *Invest Ophthalmol Vis Sci* 2015;56:2243-2253.

19. Riazi-Esfahani M, Kuppermann BD, Kenney MC. The Role of Mitochondria in AMD: Current Knowledge and Future Applications. *J Ophthalmic Vis Res* 2017;12:424-428.
20. Terluk MR, Kapphahn RJ, Soukup LM, et al. Investigating mitochondria as a target for treating age-related macular degeneration. *J Neurosci* 2015;35:7304-7311.
21. Xie W, Zhao M, Tsai SH, et al. Correlation of spectral domain optical coherence tomography with histology and electron microscopy in the porcine retina. *Exp Eye Res* 2018;177:181-190.
22. Nawrot M, West K, Huang J, et al. Cellular retinaldehyde-binding protein interacts with ERM-binding phosphoprotein 50 in retinal pigment epithelium. *Invest Ophthalmol Vis Sci* 2004;45:393-401.
23. Owsley C, McGwin G, Jr., Clark ME, et al. Delayed Rod-Mediated Dark Adaptation Is a Functional Biomarker for Incident Early Age-Related Macular Degeneration. *Ophthalmology* 2016;123:344-351.
24. Linton JD, Holzhausen LC, Babai N, et al. Flow of energy in the outer retina in darkness and in light. *Proc Natl Acad Sci U S A* 2010;107:8599-8604.
25. Yang GQ, Chen T, Tao Y, Zhang ZM. Recent advances in the dark adaptation investigations. *Int J Ophthalmol* 2015;8:1245-1252.
26. Kaynezhad P, Tachtsidis I, Sivaprasad S, Jeffery G. Watching the human retina breath in real time and the slowing of mitochondrial respiration with age. *Sci Rep* 2023;13:6445.
27. Lamb TD, Pugh EN, Jr. Dark adaptation and the retinoid cycle of vision. *Prog Retin Eye Res* 2004;23:307-380.
28. Lamb TD, Pugh EN, Jr. Phototransduction, dark adaptation, and rhodopsin regeneration the proctor lecture. *Invest Ophthalmol Vis Sci* 2006;47:5137-5152.
29. Curcio CA, McGwin G, Jr., Sadda SR, et al. Functionally validated imaging endpoints in the Alabama study on early age-related macular degeneration 2 (ALSTAR2): design and methods. *BMC Ophthalmol* 2020;20:196.
30. Davis MD, Gangnon RE, Lee LY, et al. The Age-Related Eye Disease Study severity scale for age-related macular degeneration: AREDS Report No. 17. *Arch Ophthalmol* 2005;123:1484-1498.
31. Ferris FL, 3rd, Wilkinson CP, Bird A, et al. Clinical classification of age-related macular degeneration. *Ophthalmology* 2013;120:844-851.
32. Echols BS, Clark ME, Swain TA, et al. Hyperreflective Foci and Specks Are Associated with Delayed Rod-Mediated Dark Adaptation in Nonneovascular Age-Related Macular Degeneration. *Ophthalmol Retina* 2020;4:1059-1068.
33. Curcio CA, Millican CL, Allen KA, Kalina RE. Aging of the human photoreceptor mosaic: evidence for selective vulnerability of rods in central retina. *Invest Ophthalmol Vis Sci* 1993;34:3278-3296.
34. Curcio CA, Medeiros NE, Millican CL. Photoreceptor loss in age-related macular degeneration. *Invest Ophthalmol Vis Sci* 1996;37:1236-1249.
35. Pugh EN. Rushton's paradox: rod dark adaptation after flash photolysis. *J Physiol* 1975;248:413-431.
36. Jackson GR, Edwards JG. A short-duration dark adaptation protocol for assessment of age-related maculopathy. *J Ocul Biol Dis Infor* 2008;1:7-11.
37. Leibrock CS, Reuter T, Lamb TD. Molecular basis of dark adaptation in rod photoreceptors. *Eye (Lond)* 1998;12 ( Pt 3b):511-520.
38. Sadda SR, Joeres S, Wu Z, et al. Error correction and quantitative subanalysis of optical coherence tomography data using computer-assisted grading. *Invest Ophthalmol Vis Sci* 2007;48:839-848.
39. Joeres S, Tsong JW, Updike PG, et al. Reproducibility of quantitative optical coherence tomography subanalysis in neovascular age-related macular degeneration. *Invest Ophthalmol Vis Sci* 2007;48:4300-4307.

40. Nittala MG, Ruiz-Garcia H, Sadda SR. Accuracy and reproducibility of automated drusen segmentation in eyes with non-neovascular age-related macular degeneration. *Invest Ophthalmol Vis Sci* 2012;53:8319-8324.
41. Grading diabetic retinopathy from stereoscopic color fundus photographs--an extension of the modified Airlie House classification. ETDRS report number 10. Early Treatment Diabetic Retinopathy Study Research Group. *Ophthalmology* 1991;98:786-806.
42. Lee AY, Lee CS, Blazes MS, et al. Exploring a Structural Basis for Delayed Rod-Mediated Dark Adaptation in Age-Related Macular Degeneration Via Deep Learning. *Transl Vis Sci Technol* 2020;9:62.
43. Wang JJ, Rochtchina E, Lee AJ, et al. Ten-year incidence and progression of age-related maculopathy: the blue Mountains Eye Study. *Ophthalmology* 2007;114:92-98.
44. Pollreisz A, Reiter GS, Bogunovic H, et al. Topographic Distribution and Progression of Soft Drusen Volume in Age-Related Macular Degeneration Implicate Neurobiology of Fovea. *Invest Ophthalmol Vis Sci* 2021;62:26.
45. Sura AA, Chen L, Messinger JD, et al. Measuring the Contributions of Basal Lamina Deposit and Bruch's Membrane in Age-Related Macular Degeneration. *Invest Ophthalmol Vis Sci* 2020;61:19.
46. Chen L, Messinger JD, Kar D, Duncan JL, Curcio CA. Biometrics, Impact, and Significance of Basal Linear Deposit and Subretinal Drusenoid Deposit in Age-Related Macular Degeneration. *Invest Ophthalmol Vis Sci* 2021;62:33.
47. Curcio CA. Antecedents of Soft Drusen, the Specific Deposits of Age-Related Macular Degeneration, in the Biology of Human Macula. *Invest Ophthalmol Vis Sci* 2018;59:AMD182-AMD194.
48. Lains I, Miller JB, Park DH, et al. Structural Changes Associated with Delayed Dark Adaptation in Age-Related Macular Degeneration. *Ophthalmology* 2017;124:1340-1352.
49. Wu Z, Fletcher EL, Kumar H, Greferath U, Guymer RH. Reticular pseudodrusen: A critical phenotype in age-related macular degeneration. *Prog Retin Eye Res* 2022;88:101017.
50. Flamendorf J, Agron E, Wong WT, et al. Impairments in Dark Adaptation Are Associated with Age-Related Macular Degeneration Severity and Reticular Pseudodrusen. *Ophthalmology* 2015;122:2053-2062.
51. Sevilla MB, McGwin G, Jr., Lad EM, et al. Relating Retinal Morphology and Function in Aging and Early to Intermediate Age-related Macular Degeneration Subjects. *Am J Ophthalmol* 2016;165:65-77.
52. Owsley C, Swain TA, McGwin G, Jr., Clark ME, Kar D, Curcio CA. Biologically Guided Optimization of Test Target Location for Rod-mediated Dark Adaptation in Age-related Macular Degeneration: Alabama Study on Early Age-related Macular Degeneration 2 Baseline. *Ophthalmol Sci* 2023;3:100274.
53. Zweifel SA, Spaide RF, Curcio CA, Malek G, Imamura Y. Reticular pseudodrusen are subretinal drusenoid deposits. *Ophthalmology* 2010;117:303-312 e301.
54. Rudolf M, Malek G, Messinger JD, Clark ME, Wang L, Curcio CA. Sub-retinal drusenoid deposits in human retina: organization and composition. *Exp Eye Res* 2008;87:402-408.
55. Wightman AJ, Guymer RH. Reticular pseudodrusen: current understanding. *Clin Exp Optom* 2019;102:455-462.
56. Zhang QX, Lu RW, Messinger JD, Curcio CA, Guarcello V, Yao XC. In vivo optical coherence tomography of light-driven melanosome translocation in retinal pigment epithelium. *Sci Rep* 2013;3:2644.
57. Bonilha VL, Bhattacharya SK, West KA, et al. Support for a proposed retinoid-processing protein complex in apical retinal pigment epithelium. *Exp Eye Res* 2004;79:419-422.
58. Boulton M, Dayhaw-Barker P. The role of the retinal pigment epithelium: topographical variation and ageing changes. *Eye (Lond)* 2001;15:384-389.
59. He X, Wang Y, Poiesi F, Song W, Xu Q, Feng Z, Wan Y. Exploiting multi-granularity visual features for retinal layer segmentation in human eyes. *Front Bioeng Biotechnol*. 2023 Jun 1;11:1191803. doi: 10.3389/fbioe.2023.1191803. PMID: 37324431; PMCID: PMC10267414.



60. Hu Z, Wu X, Hariri A, Sadda SR. Multiple layer segmentation and analysis in three-dimensional spectral-domain optical coherence tomography volume scans. *J Biomed Opt.* 2013 Jul;18(7):76006. doi: 10.1117/1.JBO.18.7.076006. PMID: 23843084.
61. Li Q, Li S, He Z, Guan H, Chen R, Xu Y, Wang T, Qi S, Mei J, Wang W. DeepRetina: Layer Segmentation of Retina in OCT Images Using Deep Learning. *Transl Vis Sci Technol.* 2020 Dec 9;9(2):61. doi: 10.1167/tvst.9.2.61. PMID: 33329940; PMCID: PMC7726589.

## Tables

**Table 1. Demographic Characteristics of Participants (n = 476)**

| Variable Names and Groups | Mean  | SD or n% |
|---------------------------|-------|----------|
| Age (years)               | 71.75 | 5.88     |
| Age group                 |       |          |
| 60-69                     | 166   | 34.87    |
| 70-79                     | 265   | 55.67    |
| 80-89                     | 45    | 9.45     |
| Gender                    |       |          |
| Male                      | 192   | 40.34    |
| Female                    | 284   | 59.66    |
| Race                      |       |          |
| White                     | 431   | 90.55    |
| Black                     | 40    | 8.40     |
| Other*                    | 5     | 1.05     |

SD = Standard Deviation

\*Other includes 4 Asians or Pacific Islanders and 3 Native Americans.

| Table 2A                  |                  | Correlation of RMDA at 5 degrees with Area of EZ and IZ    |                |         |         |                             |         |
|---------------------------|------------------|------------------------------------------------------------|----------------|---------|---------|-----------------------------|---------|
| Layer                     | ETDRS Subfield   | AREDS Category                                             | Area           |         |         | Correlation                 |         |
|                           |                  |                                                            | Mean           | Std Dev | p-value | Correlation Coefficient (r) | p-value |
| Ellipsoid Zone (EZ)       | Entire Grid      | All                                                        | 28.149         | 0.068   | <.0001  | -0.334                      | <.0001  |
|                           |                  | Normal                                                     | 28.270         | 0.023   |         | -0.199                      | 0.002   |
|                           |                  | Early                                                      | 28.246         | 0.111   |         | -0.272                      | 0.001   |
|                           |                  | Intermediate                                               | 27.699         | 1.423   |         | -0.268                      | 0.007   |
|                           | Central Subfield | All                                                        | 0.774          | 0.065   | <.0001  | -0.217                      | <.0001  |
|                           |                  | Normal                                                     | 0.790          | 0.003   |         | -0.055                      | 0.401   |
|                           |                  | Early                                                      | 0.787          | 0.014   |         | -0.039                      | 0.652   |
|                           |                  | Intermediate                                               | 0.752          | 0.088   |         | -0.033                      | 0.743   |
|                           | Inner Ring       | All                                                        | 6.232          | 0.281   | <.0001  | -0.348                      | <.0001  |
|                           |                  | Normal                                                     | 6.280          | 0.011   |         | -0.021                      | 0.746   |
|                           |                  | Early                                                      | 6.273          | 0.041   |         | -0.117                      | 0.175   |
|                           |                  | Intermediate                                               | 6.088          | 0.373   |         | -0.227                      | 0.023   |
|                           | Outer Ring       | All                                                        | 21.0893        | 1.058   | <.0001  | -0.292                      | <.0001  |
|                           |                  | Normal                                                     | 21.2091        | 0.016   |         | -0.291                      | <.0001  |
|                           |                  | Early                                                      | 21.1947        | 0.079   |         | -0.322                      | <.0001  |
|                           |                  | Intermediate                                               | 20.8628        | 1.128   |         | -0.258                      | 0.010   |
| Interdigitation Zone (IZ) | Entire Grid      | All                                                        | 27.125         | 3.219   | <.001   | -0.591                      | <.0001  |
|                           |                  | Normal                                                     | 28.250         | 0.136   |         | -0.442                      | <.0001  |
|                           |                  | Early                                                      | 27.909         | 0.777   |         | -0.496                      | <.0001  |
|                           |                  | Intermediate                                               | 23.223         | 5.538   |         | -0.472                      | <.0001  |
|                           | Central Subfield | All                                                        | 0.707          | 0.192   | <.001   | -0.531                      | <.0001  |
|                           |                  | Normal                                                     | 0.789          | 0.011   |         | -0.069                      | 0.288   |
|                           |                  | Early                                                      | 0.766          | 0.065   |         | -0.257                      | 0.001   |
|                           |                  | Intermediate                                               | 0.436          | 0.288   |         | -0.288                      | 0.004   |
|                           | Inner Ring       | All                                                        | 5.863          | 1.060   | <.001   | -0.584                      | <.0001  |
|                           |                  | Normal                                                     | 6.275          | 0.032   |         | -0.107                      | 0.101   |
|                           |                  | Early                                                      | 6.173          | 0.235   |         | -0.303                      | <.0001  |
|                           |                  | Intermediate                                               | 4.397          | 1.646   |         | -0.414                      | <.0001  |
|                           | Outer Ring       | All                                                        | 20.555         | 2.190   | <.001   | -0.538                      | <.0001  |
|                           |                  | Normal                                                     | 21.195         | 0.122   |         | -0.460                      | <.0001  |
|                           |                  | Early                                                      | 20.974         | 0.637   |         | -0.460                      | <.0001  |
|                           |                  | Intermediate                                               | 18.389         | 4.125   |         | -0.450                      | <.0001  |
| Table 2B                  |                  | Correlation of RMDA at 5 degrees with Mean Thickness of IZ |                |         |         |                             |         |
| Layer                     | ETDRS Subfield   | AREDS Category                                             | Mean Thickness |         |         | Correlation                 |         |
|                           |                  |                                                            | Mean           | Std Dev | p-value | Correlation Coefficient (r) | p-value |
| Interdigitation Zone (IZ) | Entire Grid      | All                                                        | 16.221         | 4.093   | <.001   | -0.434                      | <.0001  |
|                           |                  | Normal                                                     | 16.983         | 3.572   |         | -0.142                      | 0.029   |
|                           |                  | Early                                                      | 17.043         | 3.580   |         | -0.267                      | 0.002   |
|                           |                  | Intermediate                                               | 13.396         | 4.848   |         | -0.508                      | <.0001  |
|                           | Central Subfield | All                                                        | 16.295         | 5.947   | <.001   | -0.482                      | <.0001  |
|                           |                  | Normal                                                     | 18.245         | 3.723   |         | -0.082                      | 0.210   |
|                           |                  | Early                                                      | 18.225         | 4.428   |         | -0.257                      | 0.002   |
|                           |                  | Intermediate                                               | 9.505          | 7.174   |         | -0.288                      | 0.004   |
|                           | Inner Ring       | All                                                        | 15.734         | 4.684   | <.001   | -0.474                      | <.0001  |
|                           |                  | Normal                                                     | 16.987         | 3.731   |         | -0.144                      | 0.027   |
|                           |                  | Early                                                      | 17.000         | 3.746   |         | -0.231                      | 0.007   |
|                           |                  | Intermediate                                               | 11.257         | 5.480   |         | -0.431                      | <.0001  |
|                           | Outer Ring       | All                                                        | 16.362         | 4.101   | <.001   | -0.386                      | <.0001  |
|                           |                  | Normal                                                     | 16.987         | 3.731   |         | -0.126                      | 0.053   |
|                           |                  | Early                                                      | 17.043         | 3.598   |         | -0.268                      | 0.002   |
|                           |                  | Intermediate                                               | 14.238         | 5.091   |         | -0.494                      | <.0001  |

**Table 2A.** Area of preserved EZ/IZ and correlation between RMDA and EZ/IZ areas in the entire grid, central subfield, and inner and outer rings of the ETDRS grid in all eyes and subdivided by AREDS categories (normal, early AMD, intermediate AMD).

**Table 2B.** Mean thickness of IZ and correlation between RMDA and IZ in the entire grid, central subfield, and inner and outer rings of the ETDRS grid in all eyes and subdivided by AREDS categories (normal, early AMD, intermediate AMD).
